# Supplementary material for: In situ formation of a Co-MOF/Ti–Fe2O3 photoanode for efficient photoelectrochemical water splitting
Source: Royal Society of Chemistry journal article supplement (doi:10.1039/d4tc01728e), 2024-01-01
Supplement: d4tc01728e1.pdf [file d4tc01728e1.pdf]

## Support information

### **In situ formation Co-MOF/Ti-Fe<sub>2</sub>O<sub>3</sub> photoanode for efficient photoelectrochemical water splitting**

Kaikai Ba<sup>a</sup>, Hongda Li<sup>a</sup>, Kai Zhang<sup>a</sup>, Yanhong Lin<sup>a</sup>, Wanchun Zhu<sup>a,\*</sup>, Tengfeng Xie<sup>a,\*</sup>

<sup>a</sup> Institute of Physical Chemistry, College of Chemistry, Jilin University, Changchun  
130012, P. R. China

\* Corresponding author: Wanchun Zhu, Tengfeng Xie

E-mail: [wczhu@jlu.edu.cn](mailto:wczhu@jlu.edu.cn); [xietf@jlu.edu.cn](mailto:xietf@jlu.edu.cn)

## Content

|                            |   |
|----------------------------|---|
| Supplementary texts.....   | 3 |
| Supplementary figures..... | 4 |
| Supplementary table.....   | 6 |

### **Table S1**

## Chemical reagents

All the chemical reagents were not further purified.  $\text{FeCl}_3 \cdot 6\text{H}_2\text{O}$  ( $\geq 98.0\%$ ),  $\text{TiCl}_4$ ,  $\text{NaNO}_3$ ,  $\text{Co}(\text{NO}_3)_2 \cdot 6\text{H}_2\text{O}$ , terephthalic acid (PTA), and ethylene glycol (EG) were purchased from Sinopharm Chemical Reagent Co. Polyvinylpyrrolidone (PVP) was purchased from Tianjin Tiantai Fine Chemicals Co. Anhydrous ethanol, ethyl acetate, acetone, potassium hydroxide, and hydrogen peroxide were purchased from Beijing Chemical Factory. And N,N-Dimethylformamide (DMF) was purchased from Shandong Yuwang and World New Materials Co. The experimental water was ultrapure water.

## Supplementary figures

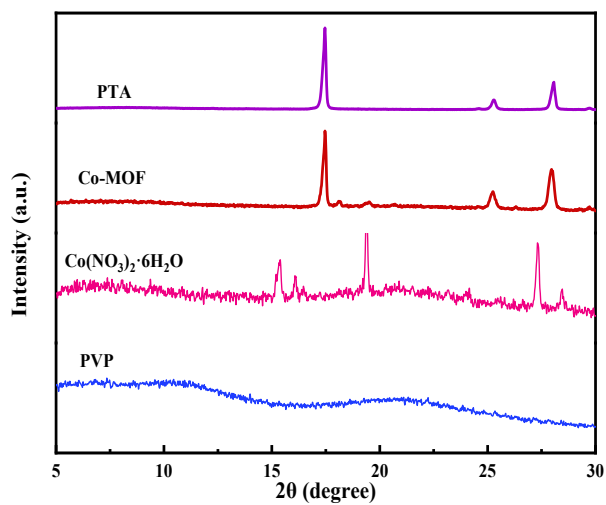

**Figure S1** XRD patterns of Co-MOF, Co(NO<sub>3</sub>)<sub>2</sub>·6H<sub>2</sub>O, PVP and PTA.

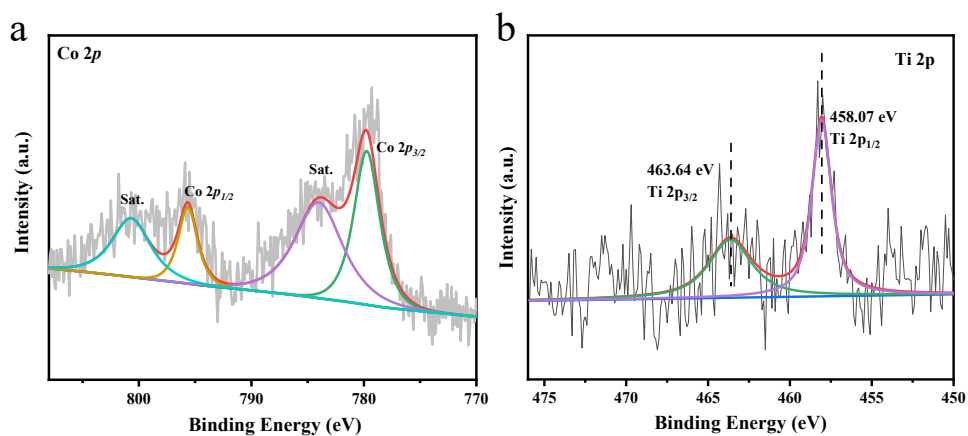

**Figure S2** XPS spectra for (a) Co 2p of Co-MOF, (b) Ti 2p of Co-MOF/Ti-Fe<sub>2</sub>O<sub>3</sub>.

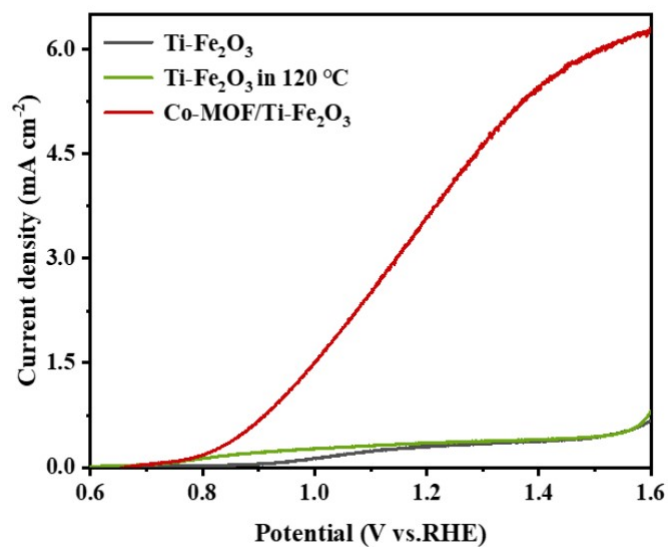

**Figure S3** LSV curves under the influence of solvents of Co-MOF/Ti-Fe<sub>2</sub>O<sub>3</sub> photoanodes.

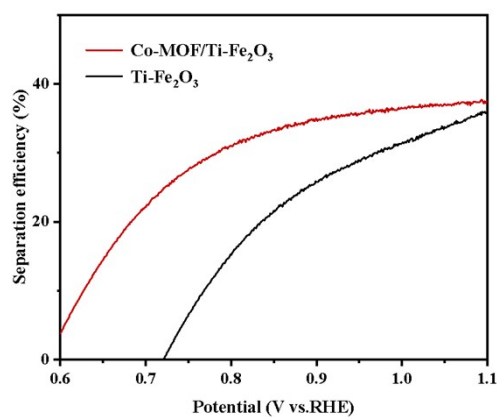

**Figure S4** The separation efficiency of Ti-Fe<sub>2</sub>O<sub>3</sub> and Co-MOF/Ti-Fe<sub>2</sub>O<sub>3</sub>.

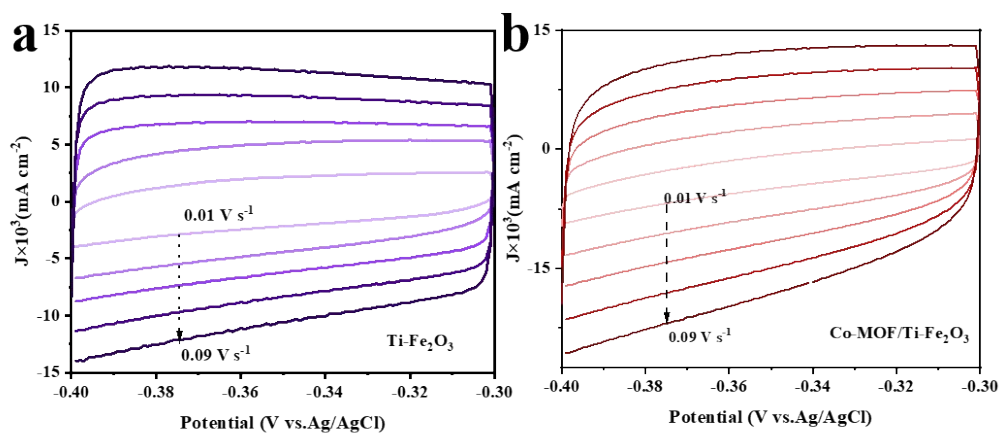

**Figure S5** CV curves of Ti-Fe<sub>2</sub>O<sub>3</sub> and Co-MOF/Ti-Fe<sub>2</sub>O<sub>3</sub> photoanodes.

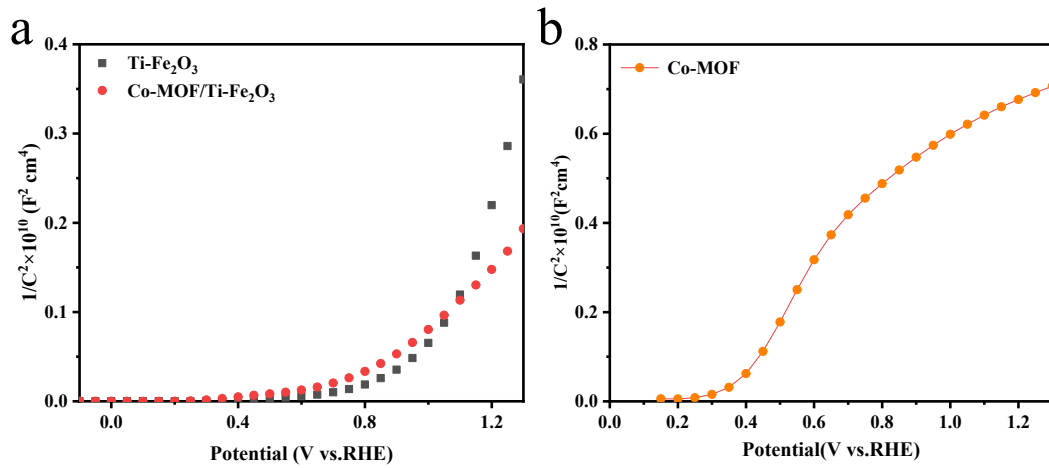

**Figure S6** Mott-Schottky curves of (a) Ti-Fe<sub>2</sub>O<sub>3</sub>, Co-MOF/Ti-Fe<sub>2</sub>O<sub>3</sub> photoanodes, (b) Co-MOF.

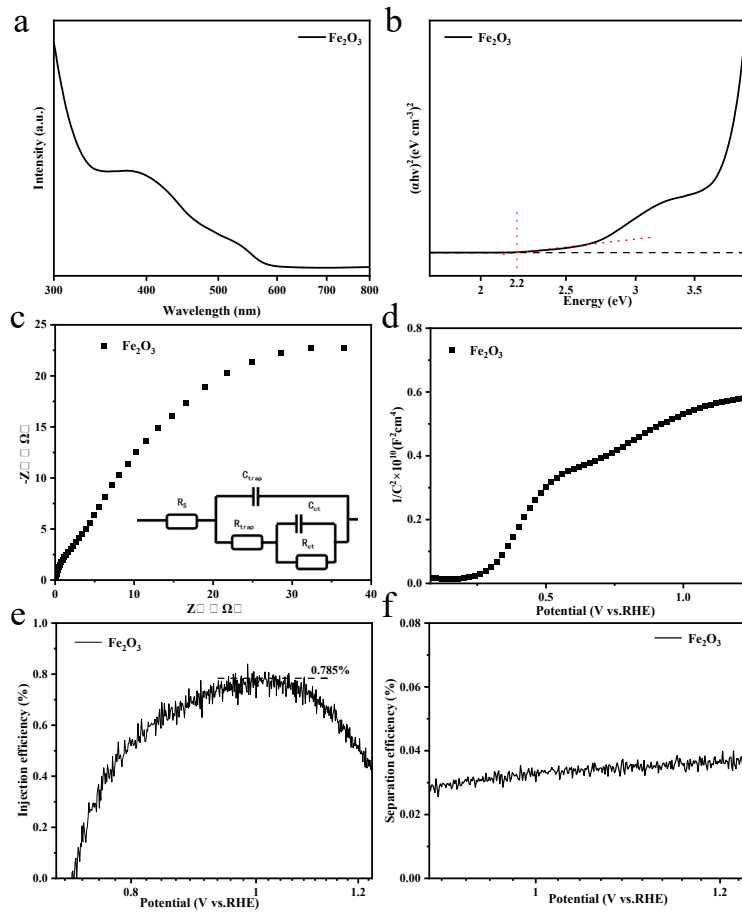

**Figure S7** (a) UV-vis spectra; (b) Tauc plot; (c) PEIS; (d) Mott-Schottky curve; (e)  $\eta_{inj}$  curve, (f)  $\eta_{sep}$  curve of Fe<sub>2</sub>O<sub>3</sub>.

### Supplementary Tables :

**Table S1.** EIS fitting results of Ti-Fe<sub>2</sub>O<sub>3</sub> and Co-MOF/Ti-Fe<sub>2</sub>O<sub>3</sub> under AM 1.5 G illumination.

| Table 1. EIS fitting results of Ti-Fe <sub>2</sub> O <sub>3</sub> and Co-MOF/Ti-Fe <sub>2</sub> O <sub>3</sub> photoanodes |                    |                       |                          |                     |                          |
|----------------------------------------------------------------------------------------------------------------------------|--------------------|-----------------------|--------------------------|---------------------|--------------------------|
| Photoanode                                                                                                                 | R <sub>S</sub> (Ω) | R <sub>bulk</sub> (Ω) | CPE1(F/cm <sup>2</sup> ) | R <sub>ct</sub> (Ω) | CPE2(F/cm <sup>2</sup> ) |
| Ti-Fe <sub>2</sub> O <sub>3</sub>                                                                                          | 68.71              | 402.1                 | 9.6476×10 <sup>-6</sup>  | 2068                | 0.83469                  |
| Co-MOF/Ti-Fe <sub>2</sub> O <sub>3</sub>                                                                                   | 63.35              | 211.5                 | 2.919×10 <sup>-5</sup>   | 696                 | 0.87179                  |

**Table S2.** N<sub>d</sub> (cm<sup>-3</sup>) of Ti-Fe<sub>2</sub>O<sub>3</sub>, Co-MOFs/Ti-Fe<sub>2</sub>O<sub>3</sub> photoanodes.

| Photoanode                         | Ti:Fe <sub>2</sub> O <sub>3</sub> | Co-MoF/Ti-Fe <sub>2</sub> O <sub>3</sub> |
|------------------------------------|-----------------------------------|------------------------------------------|
| N <sub>d</sub> (cm <sup>-3</sup> ) | 1.6× 10 <sup>20</sup>             | 4.9× 10 <sup>20</sup>                    |
